# Supplementary material for: Directly ambient pressure dried robust bridged silsesquioxane and methylsiloxane aerogels: effects of precursors and solvents
Source: Royal Society of Chemistry journal article supplement (doi:10.1039/c8ra08646j), 2019-01-01
Supplement: c8ra08646j1.pdf [file c8ra08646j1.pdf]

**Supporting Information**

**Directly ambient pressure dried robust bridged  
silsesquioxane and methlysilxoane aerogels:  
Effects of precursors and solvents**

*Dangjia Chen, Hongyi Gao\*, Panpan Liu, Pei Huang and Xiubing Huang*

Beijing Advanced Innovation Center for Materials Genome Engineering, Beijing Key  
Laboratory of Function Materials for Molecule & Structure Construction, School of  
Materials Science and Engineering, University of Science and Technology Beijing,  
Beijing 100083, PR China.

\*Corresponding author at: No. 30, Xueyuan Road, Haidian District, Beijing City, PR  
China.

\*E-mail: [hygao2009@163.com](mailto:hygao2009@163.com) (H. Y. Gao); Tel.: +86-10-62333765.

Table S1. The detailed formulas of the products.

| Sample | APTES<br>(mmol) | APDEMS<br>(mmol) | MPA<br>(mmol) | Ethanol<br>(mL) | Methanol<br>(mL) | Water<br>(mL) |
|--------|-----------------|------------------|---------------|-----------------|------------------|---------------|
| TME    | 4.27            | 0                | 2.13          | 7               | 0                | 0.5           |
| TMM    | 4.27            | 0                | 2.13          | 0               | 7                | 0.5           |
| DME    | 0               | 4.27             | 2.13          | 7               | 0                | 0.5           |
| DMM    | 0               | 4.27             | 2.13          | 0               | 7                | 0.5           |

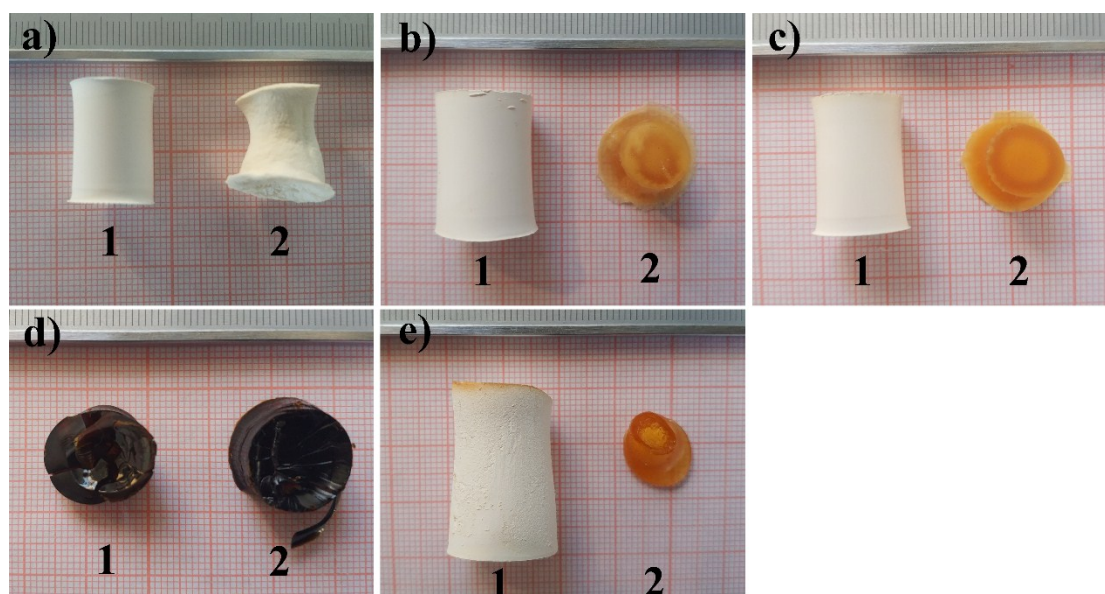

Figure S1. The optical images of aerogels prepared from different precursors and solvents; aerogels prepared from BSQ precursor are marked with 1, from BMSQ precursor are marked with 2, a) propanol, b) isopropanol, c) n-butyl alcohol, d) acetone and e) N,N-dimethylformamide are used as solvents; the shrinkage is calculated to be about a1) 34.1%, b1) 23.2%, c1) 34.7%, e1) 13.9%; gels prepared from BMSQ precursor are badly shrunken and twisted after drying; gels prepared using acetone as solvent are deep red translucent monoliths and they fragmented into pieces after drying.

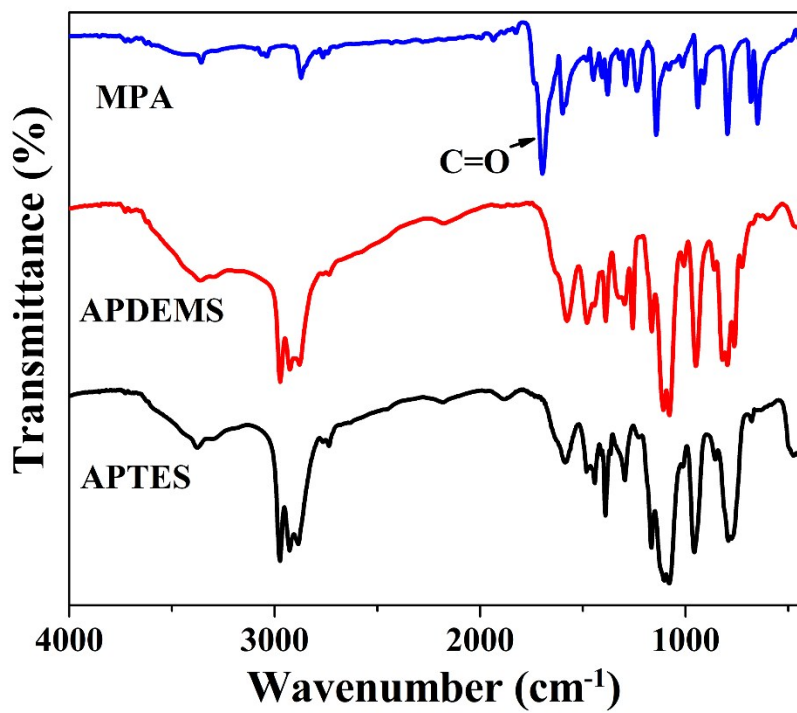

Figure S2. The FT-IR spectra of the start monomers of the aerogels.

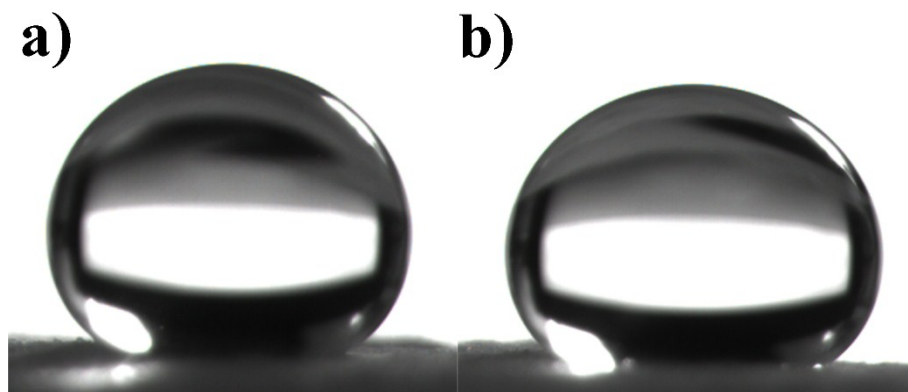

Figure S3. Water droplet on the surface of a) DME, b) DMM.

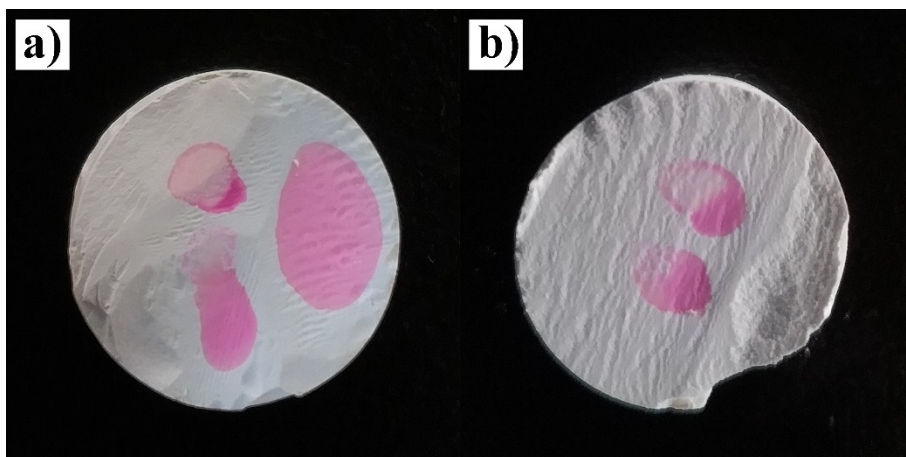

Figure S4. Water dyed with rhodamine B absorbed by a) TME, b) TMM.

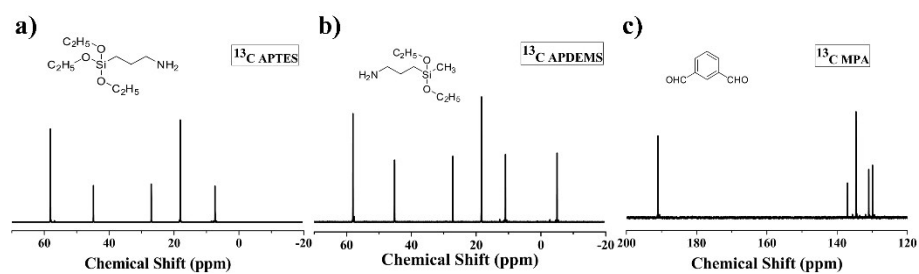

Figure S5. The  $^{13}\text{C}$  NMR spectra of the start monomers.

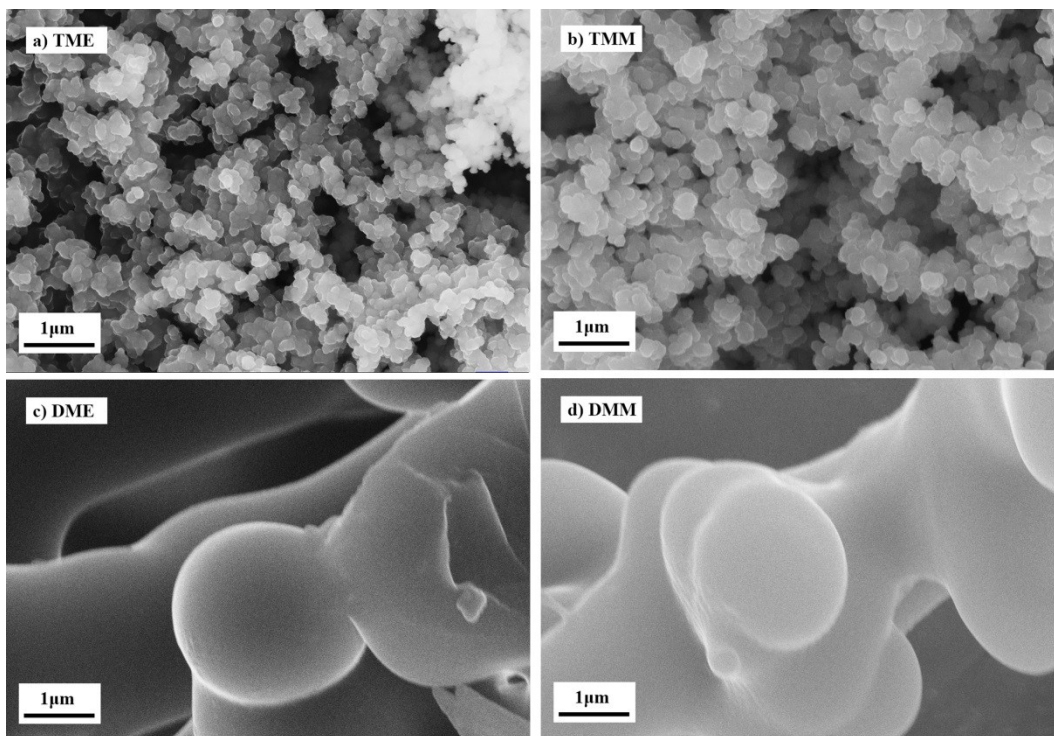

Figure S6. The SEM images of the aerogels with 40000 times magnification.

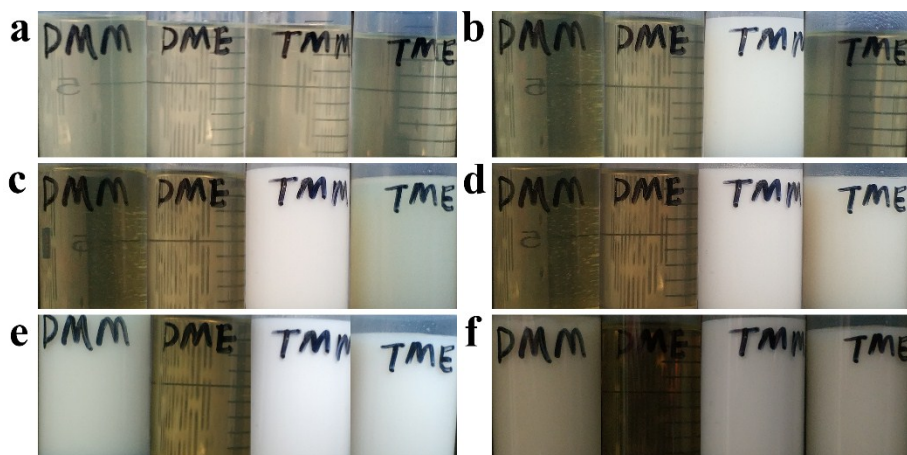

Figure S7. Photos of the sol-gel process taken every 2 hours, showing the reaction of different samples in the sol-gel process.

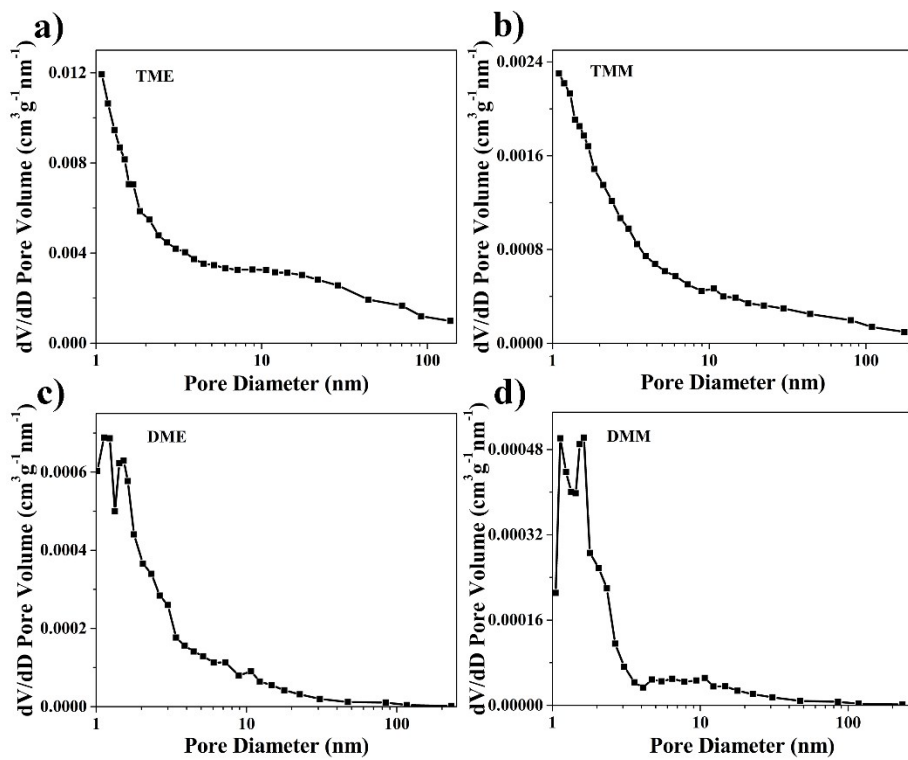

Figure S8. The pore size distribution of the aerogels.

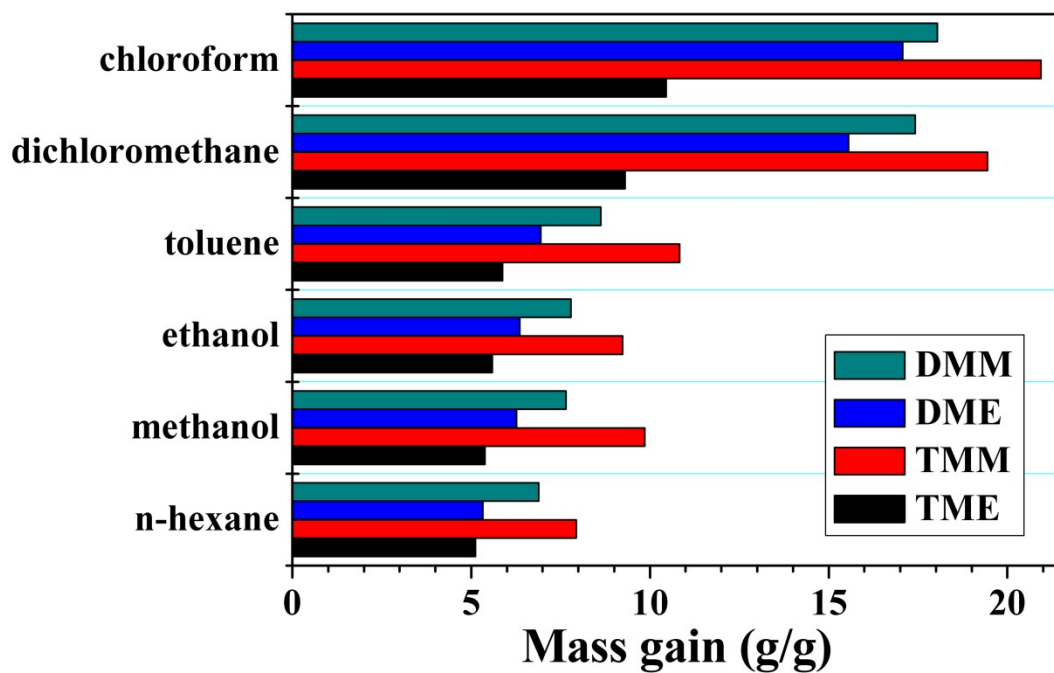

Figure S9. The oil absorption capacity of the aerogels.

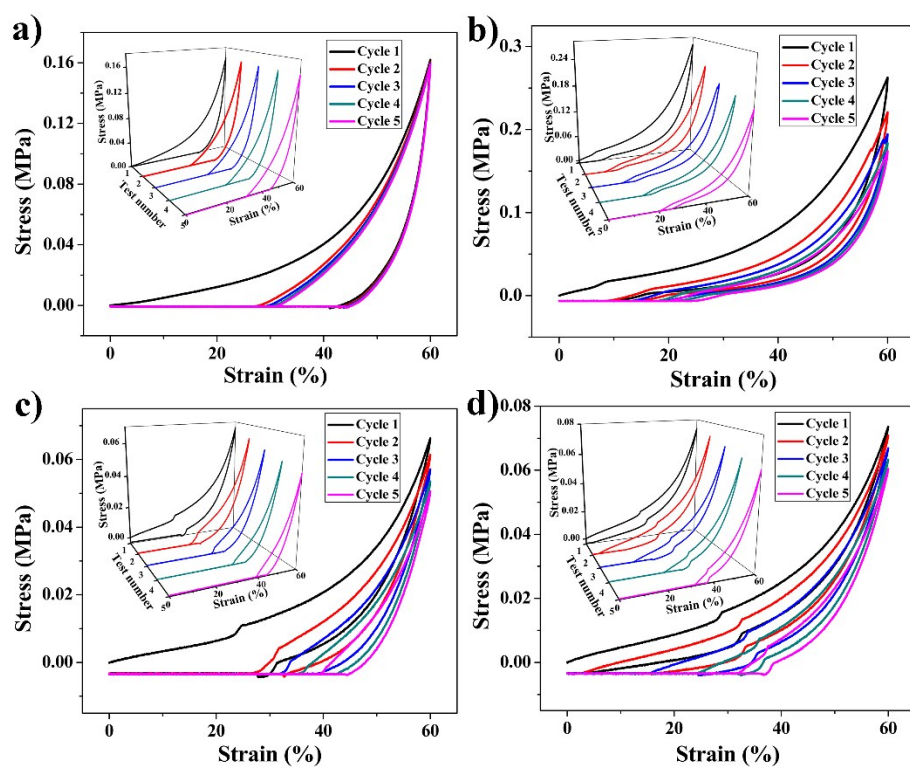

Figure S10. The stress-strain curves of the undried gels, a) wet TME, b) wet TMM, c) wet DME and d) wet DMM.
